# Supplementary material for: 1,5-Benzodiazepin-2(3H)-ones: In Vitro Evaluation as Antiparkinsonian Agents
Source: MDPI journal article supplement (doi:10.3390/antiox10101584), 2021-10-09
Supplement: s1 [file s1]

## SUPPLEMENTARY INFORMATION

### 1,5-Benzodiazepin-2(3H)-ones: *in vitro* evaluation as antiparkinsonian agents

Ana Ortiz de Zárate<sup>1</sup>, Marta Pérez-Torralba<sup>2</sup>, Iñigo Bonet Isidro<sup>1</sup>, Concepción López<sup>2</sup>, Rosa M. Claramunt<sup>2,\*</sup>, Diana Martínez-Casanova<sup>1</sup>, Isabel Sánchez-Vera<sup>1</sup>, Jesús Jiménez González<sup>1</sup> and José Luis Lavandera<sup>1,3,\*</sup>

<sup>1</sup>Instituto de Medicina Molecular Aplicada (IMMA), Facultad de Medicina, Universidad San Pablo-CEU. CEU Universities. Campus de Montepríncipe, Boadilla, E-28668 Madrid, Spain.

<sup>2</sup>Departamento de Química Orgánica y Bio-Orgánica, Facultad de Ciencias, Universidad Nacional de Educación a Distancia (UNED), Paseo Senda del Rey, 9, E-28040 Madrid, Spain.

<sup>3</sup> Department of Pharmacology, Physiology and Neuroscience. Medical School. Rutgers. The State University of New Jersey. 185 South Orange Avenue. Newark. NJ 07103. USA

\*Correspondence: rclaramunt@ccia.uned.es; joseluis.lavandera@ceu.es

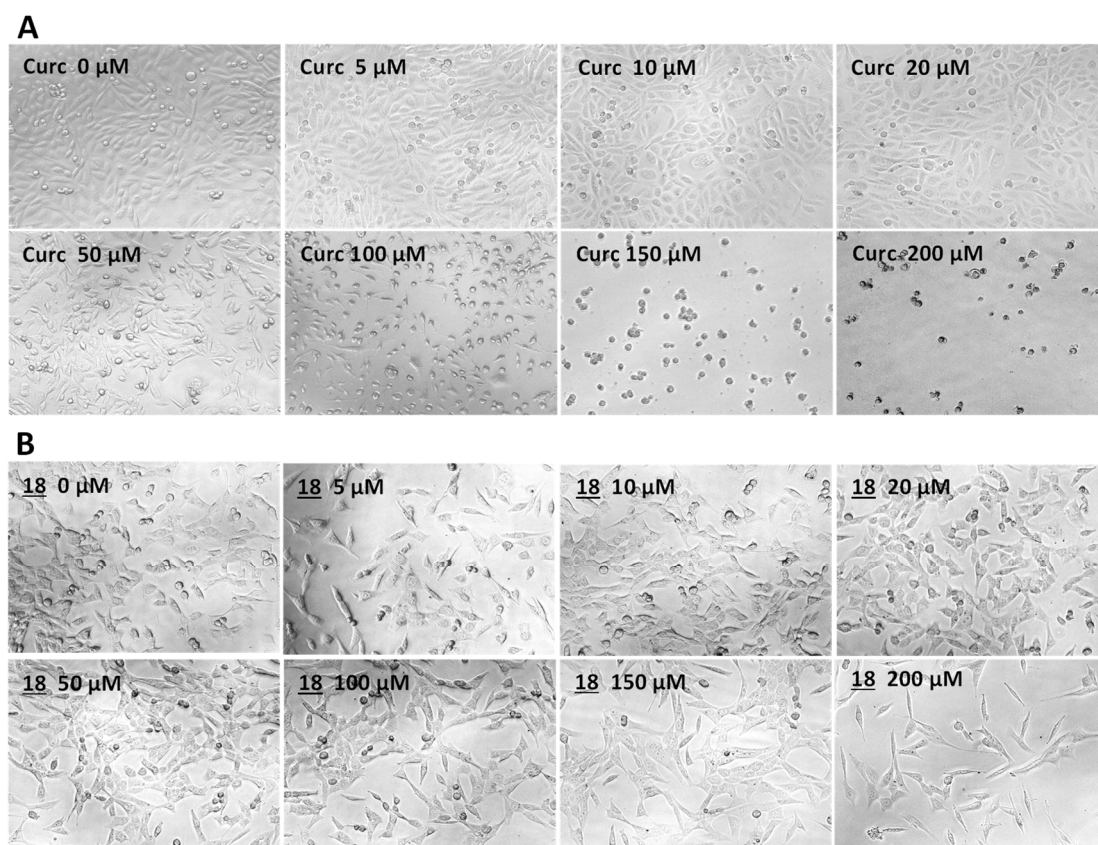

Figure S1. Cytotoxicity results were obtained for curcumin (A) and compound 18 (B) against SH-SY5Y cells. Images were taken with a Leica DM IL inverted microscope with a Leica EC3 camera at 10X.

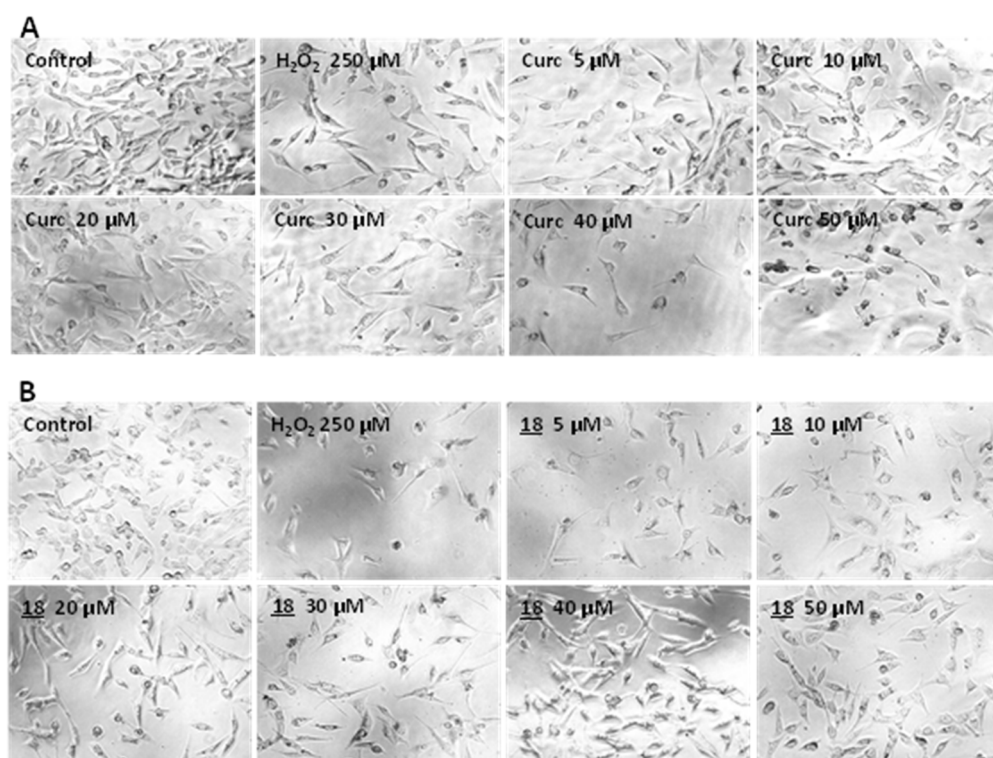

Figure S2. Results from protection experiment in SH-SY5Y cells with curcumin (A) and compound **18** (B) under oxidative stress induced by  $H_2O_2$  250  $\mu M$ . Images were taken with a Leica DM IL inverted microscope with a Leica EC3 camera at 10X.

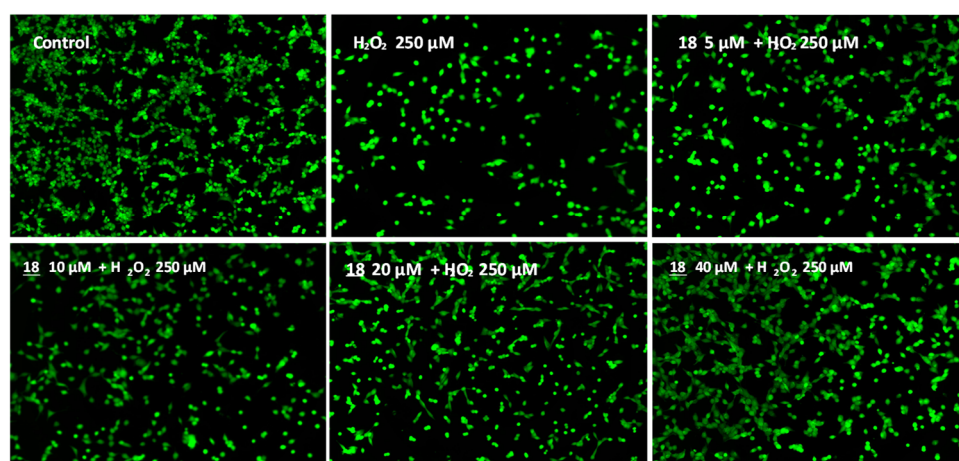

Figure S3. Representative fluorescent microscopy images from Calcein-AM staining experiments with compound **18** against  $H_2O_2$  induced cytotoxicity in SH-SY5Y cells. Images were taken at 4X.

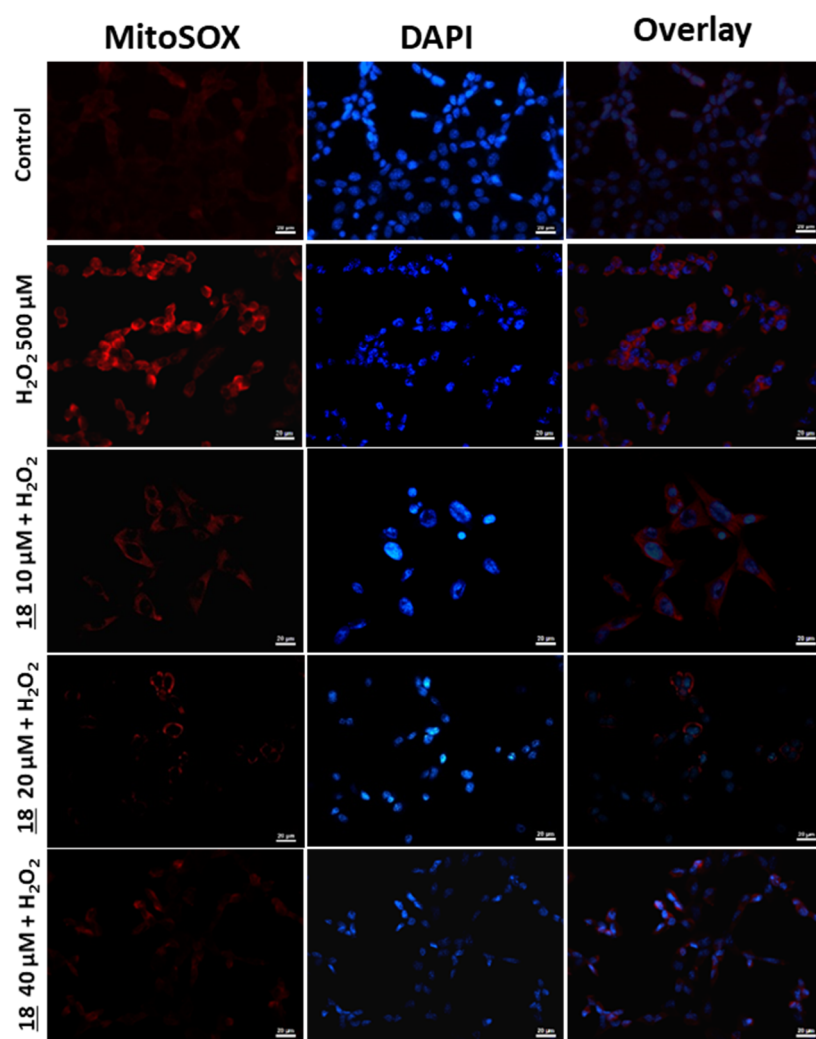

Figure S4. Images from MitoSOX experiments performed with compound 18 at 10, 20 and 40  $\mu$ M in SH-SY5Y cells under oxidative stress induced by H<sub>2</sub>O<sub>2</sub> 250  $\mu$ M for 24h. Images were taken with a Leica DM 5500B microscope with a Leica DFC425FX camera.

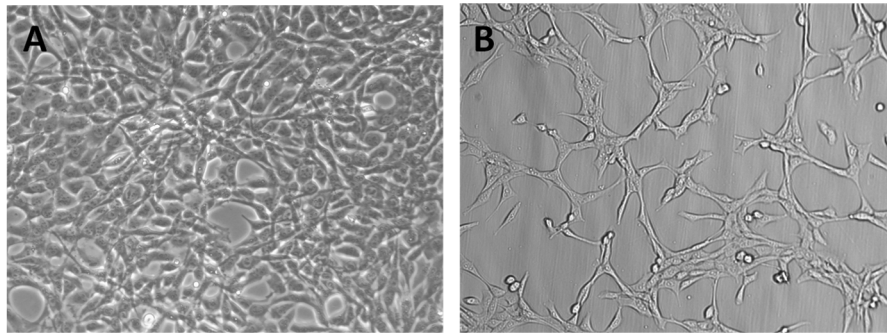

Figure S5. Undifferentiated (A) versus differentiated (B) SH-SY5Y cells. SHSY5Y cells were differentiated for 8 days by RA 10  $\mu$ M treatment in DMEM:F12 with FBS 1%. Medium with RA was replaced on Days 2, 4, 6, and 8. Pictures taken on day 8 allows the identification of a more neuronal-like morphology with axon-like projections. Images were taken at 10X magnification using a Leica DM IL inverted microscope with a Leica EC3 camera.

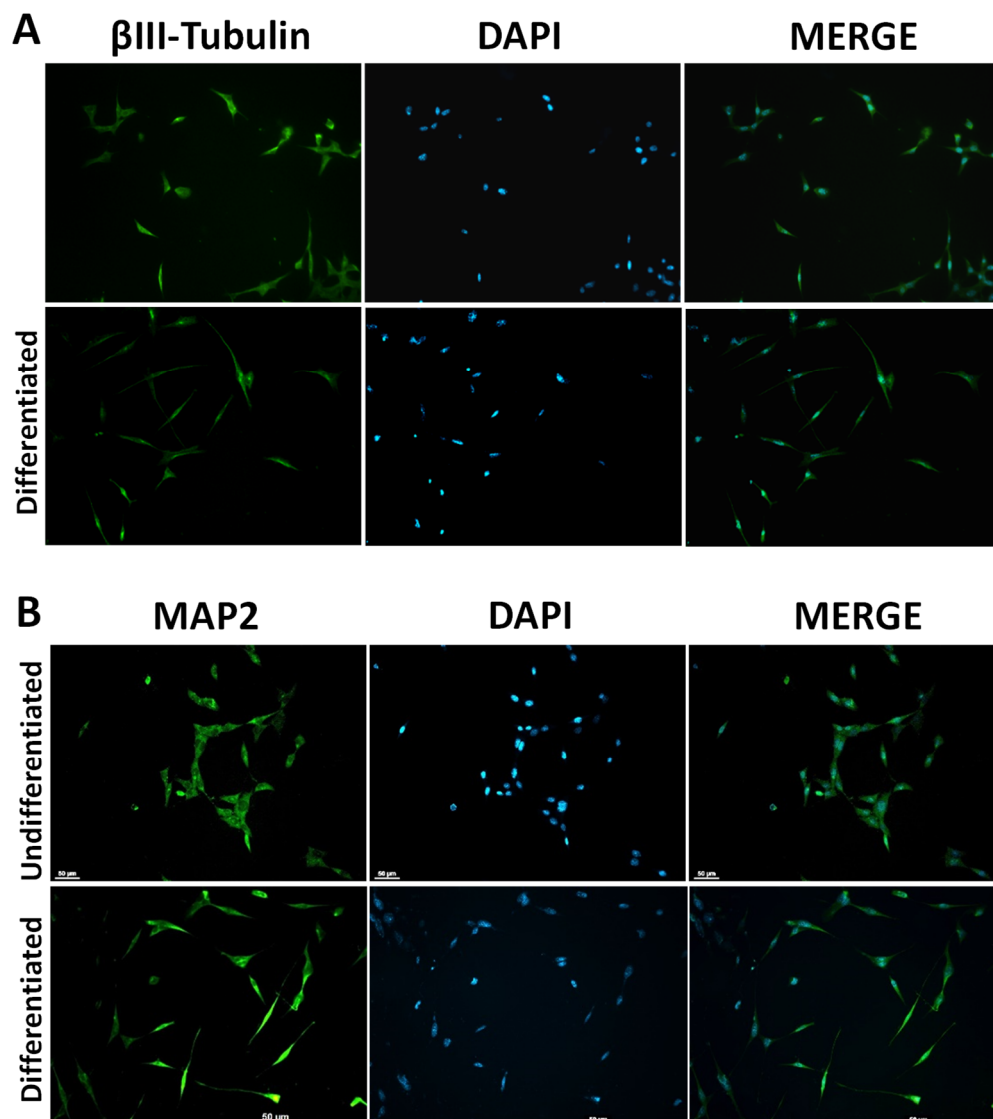

Figure S6. Fluorescence microscopy images of undifferentiated and differentiated SH-SY5Y cells using  $\beta$ III-Tubulin and MAP2 to highlight their different morphology features. Images were obtained at 50X magnification.

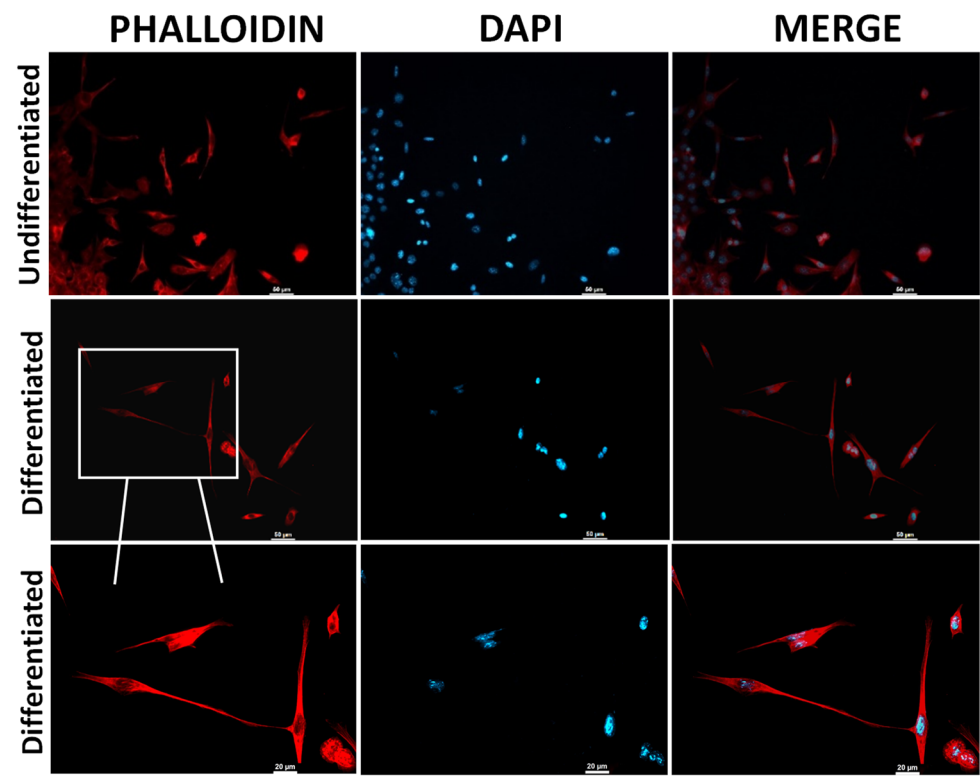

Figure S7. Staining of undifferentiated and differentiated SH-SY5Y cells with phalloidin and DAPI. Images were taken at 50 µm with a Leica DM5500 microscope.
